# Supplementary material
Source: publisher figshare collection journal article supplement (https://acs.figshare.com/ndownloader/files/13601015)
Supplement: Supplementary file 1 [file 13601015]

# **Mechanically Assembled, Three-Dimensional Hierarchical Structures of Cellular Graphene with Programmed Geometries and Outstanding Electromechanical Properties**

*Yun Ling,<sup>1†</sup> Xiatian Zhuang,<sup>1†</sup> Zheng Xu,<sup>2,3</sup> Yunchao Xie,<sup>1</sup> Xiaoyu Zhu,<sup>4</sup> Yadong Xu,<sup>4</sup> Bohan Sun,<sup>1</sup> Jian Lin,<sup>1\*</sup> Yihui Zhang,<sup>2\*</sup> and Zheng Yan<sup>1,4\*</sup>*

<sup>1</sup>Department of Mechanical & Aerospace Engineering, University of Missouri, Columbia, Missouri 65211, United States

<sup>2</sup>AML, Department of Engineering Mechanics; Center for Flexible Electronics Technology; Tsinghua University, Beijing 100084, China

<sup>3</sup>State Key Laboratory for Manufacturing and Systems Engineering, School of Mechanical Engineering, Xi'an Jiaotong University, Xi'an 710049, China

<sup>4</sup>Department of Biomedical, Biological & Chemical Engineering, University of Missouri, Columbia, Missouri 65211, United States

†These authors contributed equally to this work.

\*E-mail: yanzheng@missouri.edu, yihuizhang@tsinghua.edu.cn, linjian@missouri.edu

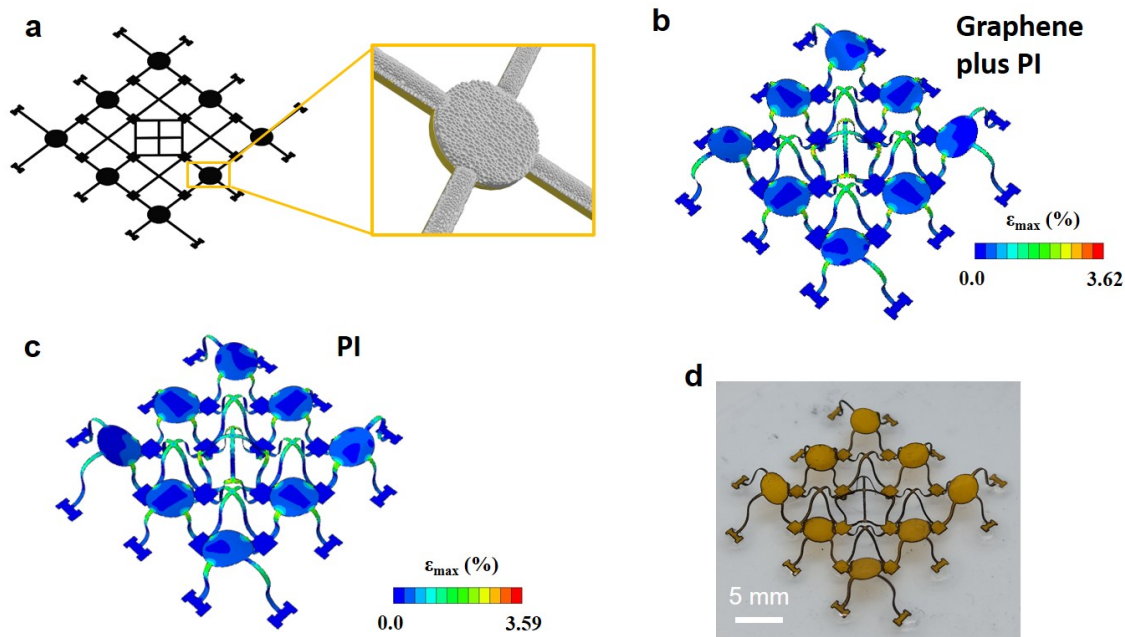

**Figure S1.** (a) Schematic illustration of the 2D precursor of the mixed table and tent of cellular graphene/PI bilayer. The FEA simulation results of the 3D structure of the mixed table and tent made of cellular graphene/PI bilayers (b) and PI (c). (d) Optical image of the 3D structure of the mixed table and tent of PI. The color in FEA results denotes the maximum principal strain.

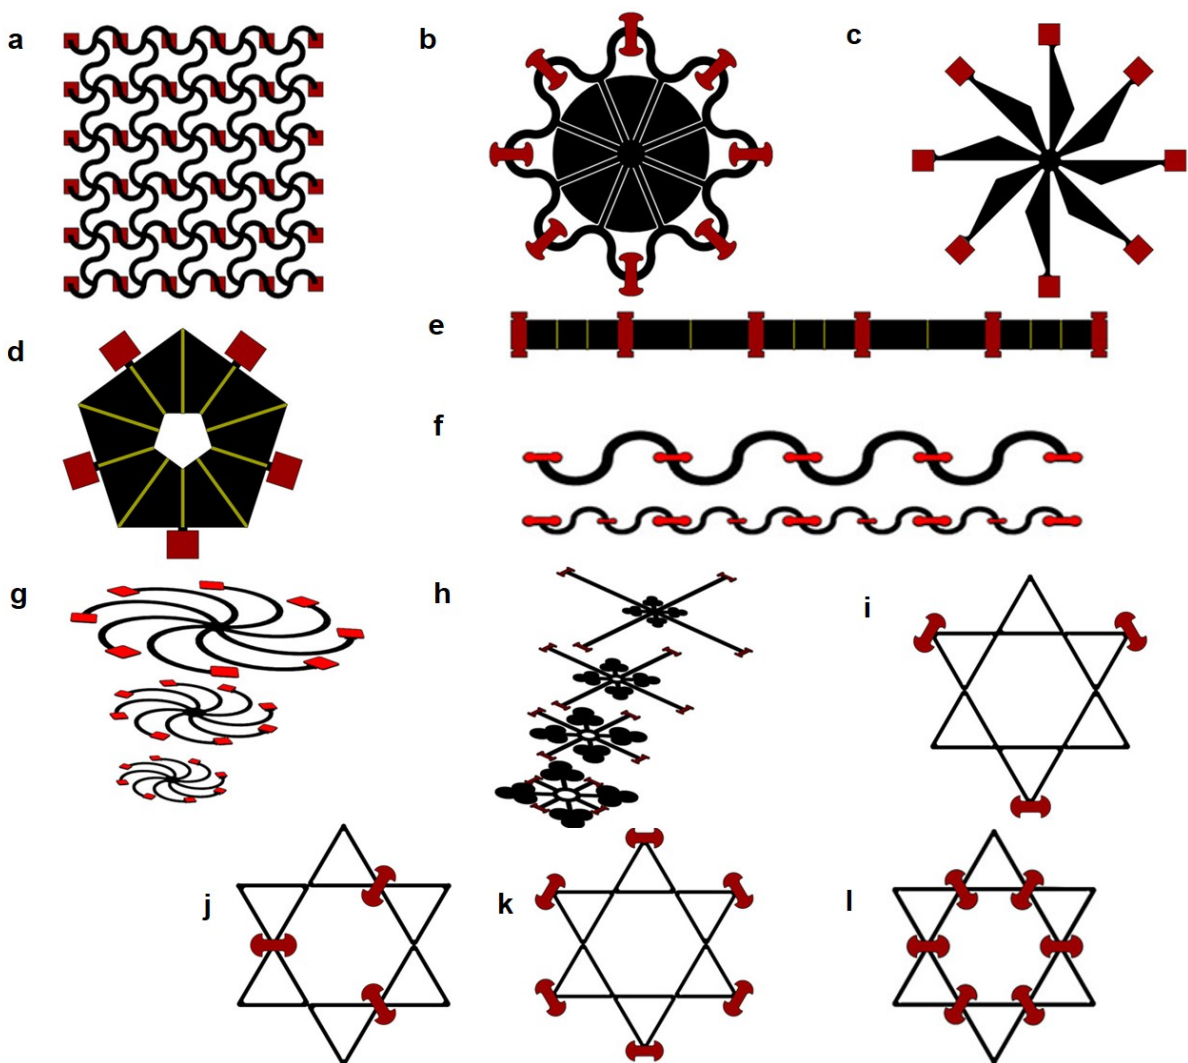

**Figure S2.** Schematic illustrations of the 2D precursors of various geometries with bonding sites (red parts) and crease of origami (yellow parts). (a) 5 x 6 array of double-floor helix. Kirigami-inspired, jelly fish-like (b) and windmill-like (c) structures. Origami-inspired, five-pointed star-like (d) and alternative mountain-like (e) structures. Structures with fully-separated multilayers: double-layer helical coils (f), trilayer cages (g) and four-layer trees (h). (i-l) Open-mesh structures.

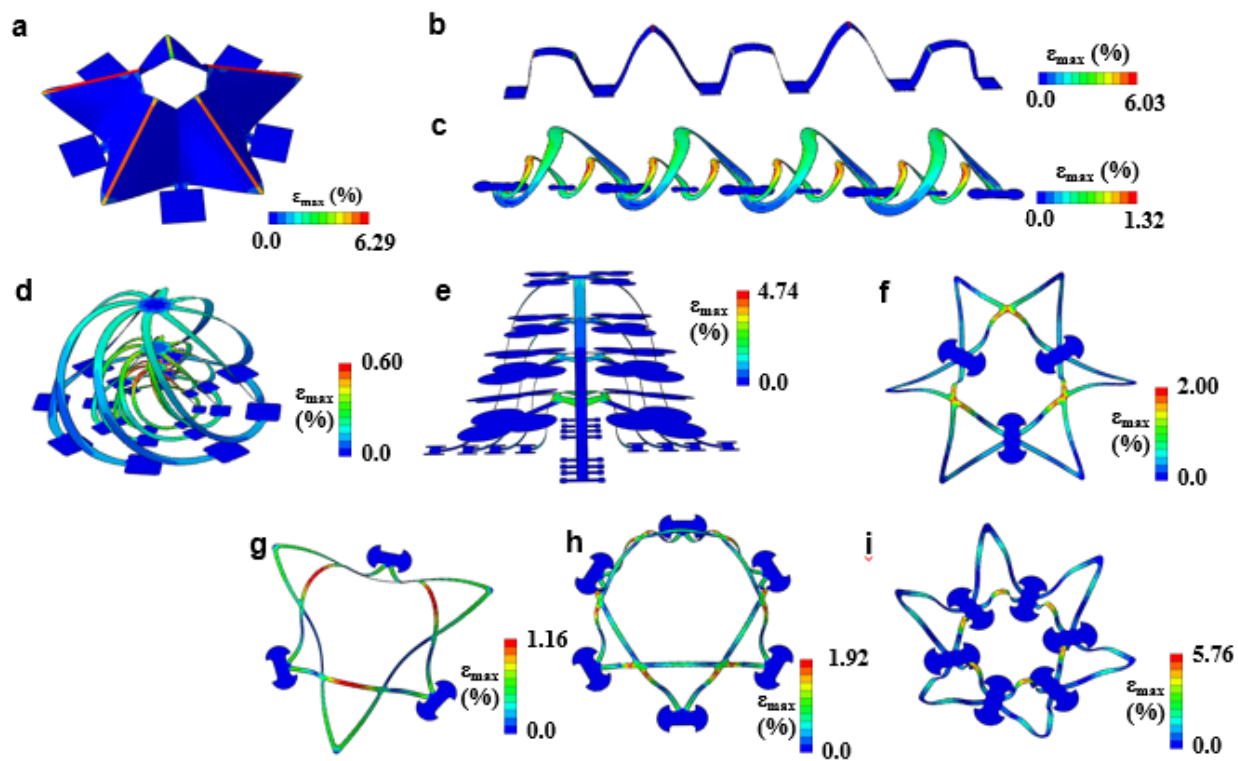

**Figure S3.** FEA results of 3D hierarchical structures with various geometries. Origami-inspired, five-pointed star-like (a) and alternative mountain-like (b) structures. 3D structures with fully-separated multilayers: double-layer helical coils (c), trilayer cages (d) and four-layer trees (e). (f-i) 3D open-mesh structures. The color denotes the maximum principal strains in the cellular graphene.

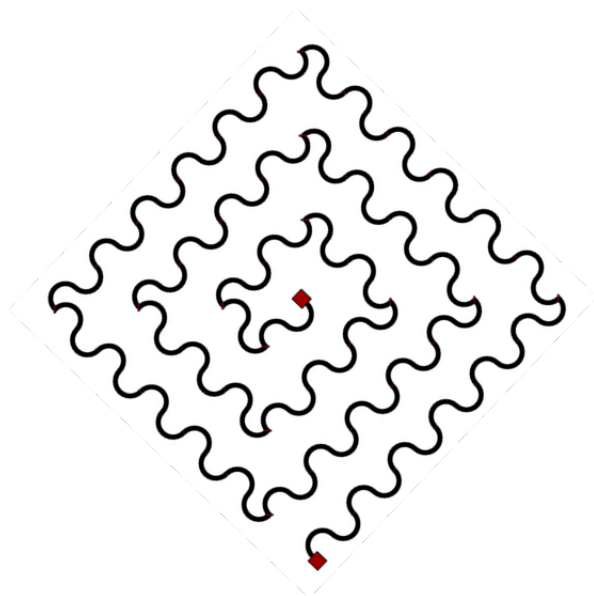

**Figure S4.** Schematic illustration of the 2D precursor design for 3D helical coils in Figure 3.

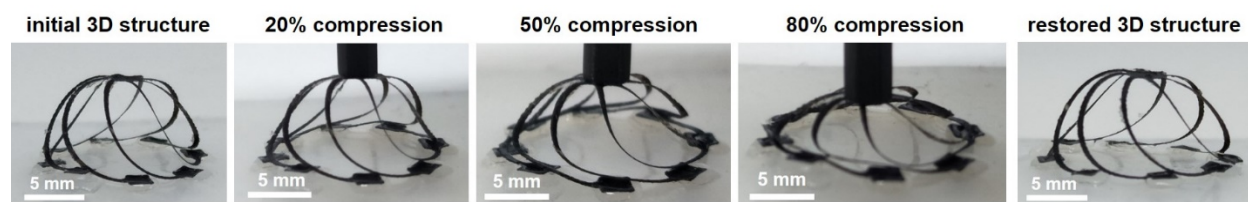

**Figure S5.** Optical images of cage-like 3D structure of cellular graphene (from left to right) before compression, at 20% compression, at 50% compression, at 80% compression, and after compression.

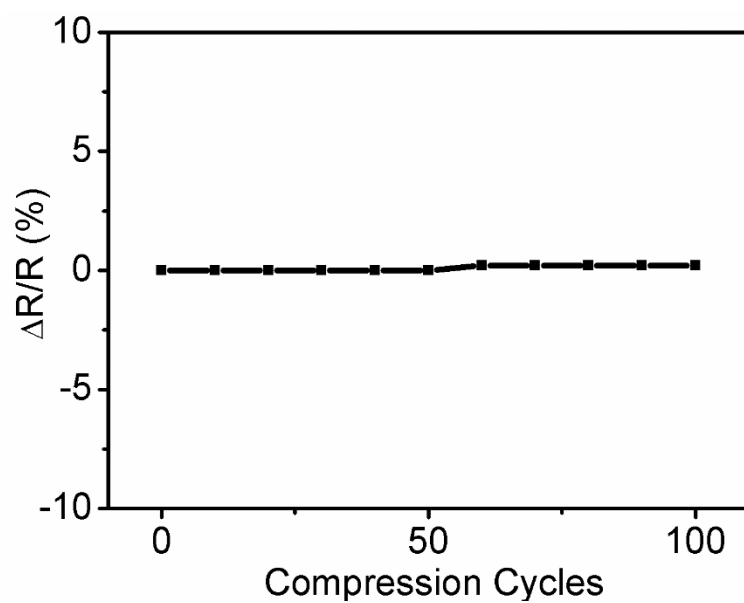

**Figure S6.** The electrical-resistance variation of 3D cage of cellular graphene, illustrated in Figure S5, as a function of compression cycles for 80% vertical compression.

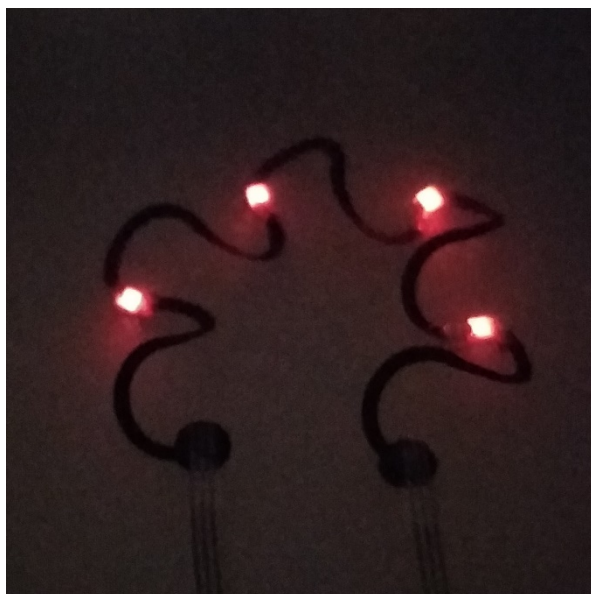

**Figure S7.** The LED arrays remain functional after 1000 cycles of biaxially stretching to 100%.
